# Supplementary material for: Analysing Syntactic Regularities and Irregularities in SNOMED-CT
Source: PubMed Central journal article supplement (PMC3637289; doi:10.1186/2041-1480-3-8), 2012-12-17
Supplement: 2041-1480-3-8-S1.pdf [file 2041-1480-3-8-S1.pdf]

'Dizziness present (situation)' *EquivalentTo*

'Clinical finding present (situation)'

**and** (RoleGroup **some**

((('Associated finding (attribute)' **some** 'Dizziness (finding)')

**and** ('Finding context (attribute)' **some** 'Known present (qualifier value)')

**and** ('Temporal context (attribute)' **some** 'Current or specified time (qualifier value)')

**and** ('Subject relationship context (attribute)' **some** 'Subject of record (person)'))))

'Paralysis present (situation)' *EquivalentTo*

'Clinical finding present (situation)'

**and** (RoleGroup **some**

((('Associated finding (attribute)' **some** 'Paralysis (finding)')

**and** ('Finding context (attribute)' **some** 'Known present (qualifier value)')

**and** ('Temporal context (attribute)' **some** 'Current or specified time (qualifier value)')

**and** ('Subject relationship context (attribute)' **some** 'Subject of record (person)'))))
