# Supplementary material for: Analysing Syntactic Regularities and Irregularities in SNOMED-CT
Source: PubMed Central journal article supplement (PMC3637289; doi:10.1186/2041-1480-3-8), 2012-12-17
Supplement: 2041-1480-3-8-S2.pdf [file 2041-1480-3-8-S2.pdf]

?PresentSituation *EquivalentTo*

'Clinical finding present (situation)'

**and** (RoleGroup **some**

(( 'Associated finding (attribute)' **some** ?Finding)

**and** ( 'Finding context (attribute)' **some** 'Known present (qualifier value)')

**and** ( 'Temporal context (attribute)' **some** 'Current or specified time (qualifier value)')

**and** ( 'Subject relationship context (attribute)' **some** 'Subject of record (person)'))))

*where:*

?PresentSituation = ['Paralysis present (situation)', 'Dizziness present (situation)...]

?Finding = ['Paralysis (finding)', 'Dizziness (finding)...]
