# Supplementary material for: Analysing Syntactic Regularities and Irregularities in SNOMED-CT
Source: PubMed Central journal article supplement (PMC3637289; doi:10.1186/2041-1480-3-8), 2012-12-17
Supplement: 2041-1480-3-8-S3.pdf [file 2041-1480-3-8-S3.pdf]

'On examination - joint effusion present (disorder)' *Equivalent To*  
'On examination - specified examination finding (finding)'  
**and** 'Effusion of joint (disorder)'
