# Supplementary material for: Analysing Syntactic Regularities and Irregularities in SNOMED-CT
Source: PubMed Central journal article supplement (PMC3637289; doi:10.1186/2041-1480-3-8), 2012-12-17
Supplement: 2041-1480-3-8-S4.pdf [file 2041-1480-3-8-S4.pdf]

```
?PresentSituation:CLASS, ?Finding:CLASS
SELECT ?PresentSituation EquivalentTo
'Clinical finding present (situation)'
  and (RoleGroup some
    (('Associated finding (attribute)' some ?Finding)
    and ('Finding context (attribute)' some 'Known present (qualifier value)')
    and ('Temporal context (attribute)' some
      'Current or specified time (qualifier value)'))
    and ('Subject relationship context (attribute)'
      some 'Subject of record (person)'))))
ADD ?PresentSituation SubClassOf PatternInstance
END;
```
