# Supplementary material for: Analysing Syntactic Regularities and Irregularities in SNOMED-CT
Source: PubMed Central journal article supplement (PMC3637289; doi:10.1186/2041-1480-3-8), 2012-12-17
Supplement: 2041-1480-3-8-S5.pdf [file 2041-1480-3-8-S5.pdf]

- B1 *SubClassOf* B (1)
- B2 *SubClassOf* B (2)
- B3 *SubClassOf* B (3)
- C *SubClassOf* A (4)
- B *SubClassOf* A (5)
- C1 *SubClassOf* C (6)
- C2 *SubClassOf* C (7)
- C3 *SubClassOf* C (8)
- C3 *SubClassOf* hasP1 **some** B3 (9)
- C3 *SubClassOf* hasP1 **only** B3 (10)
- C4 *SubClassOf* hasP1 **some** B4 (11)
- C4 *SubClassOf* hasP1 **only** B4 (12)
- C5 *SubClassOf* hasP1 **some** B1 (13)
