# Supplementary material for: Analysing Syntactic Regularities and Irregularities in SNOMED-CT
Source: PubMed Central journal article supplement (PMC3637289; doi:10.1186/2041-1480-3-8), 2012-12-17
Supplement: 2041-1480-3-8-S6.pdf [file 2041-1480-3-8-S6.pdf]

$?class\_2$  *SubClassOf*  $?class\_1$  (14)

$?class\_2$  *SubClassOf*  $?objectProperty\_1$  **some**  $?class\_1$  (15)

$?class\_2$  *SubClassOf*  $?objectProperty\_1$  **only**  $?class\_1$  (16)
