# Supplementary material for: Analysing Syntactic Regularities and Irregularities in SNOMED-CT
Source: PubMed Central journal article supplement (PMC3637289; doi:10.1186/2041-1480-3-8), 2012-12-17
Supplement: 2041-1480-3-8-S7.pdf [file 2041-1480-3-8-S7.pdf]

?\* *SubClassOf* B

?owlClass *SubClassOf* ?owlObjectProperty **some** ?\*

?owlClass *SubClassOf* ?owlObjectProperty **only** ?\*
