# Supplementary material for: Analysing Syntactic Regularities and Irregularities in SNOMED-CT
Source: PubMed Central journal article supplement (PMC3637289; doi:10.1186/2041-1480-3-8), 2012-12-17
Supplement: 2041-1480-3-8-S8.pdf [file 2041-1480-3-8-S8.pdf]

### Clusters:

?cluster<sub>1</sub> : {B1, B2, B3, B4}

?cluster<sub>2</sub> : {C3, C4, C5}

?cluster<sub>3</sub> : {C1, C2}

?cluster<sub>4</sub> : {B, C}

### Generalisations:

?cluster<sub>1</sub> *SubClassOf* B

?cluster<sub>2</sub> *SubClassOf* hasP1 **some** ?cluster<sub>1</sub>

?cluster<sub>2</sub> *SubClassOf* hasP1 **only** ?cluster<sub>1</sub>

?cluster<sub>3</sub> *SubClassOf* C

?cluster<sub>4</sub> *SubClassOf* A

### Instantiations:

B1 *SubClassOf* B

B2 *SubClassOf* B

B3 *SubClassOf* B

C3 *SubClassOf* hasP1 **some** B3

C4 *SubClassOf* hasP1 **some** B4

C5 *SubClassOf* hasP1 **some** B1

C3 *SubClassOf* hasP1 **only** B3

C4 *SubClassOf* hasP1 **only** B4

C1 *SubClassOf* C

C2 *SubClassOf* C

C3 *SubClassOf* C

C *SubClassOf* A

B *SubClassOf* A
