# Supplementary material for: Analysing Syntactic Regularities and Irregularities in SNOMED-CT
Source: PubMed Central journal article supplement (PMC3637289; doi:10.1186/2041-1480-3-8), 2012-12-17
Supplement: 2041-1480-3-8-S9.pdf [file 2041-1480-3-8-S9.pdf]

```
?c:CLASS, ?x:CONSTANT = MATCH(".Present.*")
SELECT ?c.IRI label ?x
BEGIN
ADD ?c subClassOf PresentInTheBeginningCandidate
END;
```

```
?c:CLASS, ?x:CONSTANT = MATCH(".*present.*")
SELECT ?c.IRI label ?x
BEGIN
ADD ?c subClassOf PresentInTheMiddleCandidate
END;
```
