# Supplementary material for: Analysing Syntactic Regularities and Irregularities in SNOMED-CT
Source: PubMed Central journal article supplement (PMC3637289; doi:10.1186/2041-1480-3-8), 2012-12-17
Supplement: 2041-1480-3-8-S10.pdf [file 2041-1480-3-8-S10.pdf]

### Generalisation:

?cluster<sub>1</sub> *EquivalentTo* ?cluster<sub>20</sub>  
    **and** ?cluster<sub>23</sub> **some** ?expression\_conjunction  
        **and** ?cluster<sub>23</sub> **some** ?cluster<sub>16</sub>

### Example Instantiation:

'Coin sign present (situation)' *EquivalentTo*  
    'Clinical finding present (situation)'  
        **and** (RoleGroup **some** ((Associated finding (attribute) **some** 'Coin sign (finding)'))  
            **and** ('Finding context (attribute)' **some** 'Known present (qualifier value)'))  
        **and** ('Temporal context (attribute)' **some** 'Current or specified time (qualifier value)'))  
        **and** ('Subject relationship context (attribute)' **some** 'Subject of record (person)'))

where:

?cluster<sub>1</sub>: CLASS=['Coin sign present (situation)'],  
?cluster<sub>20</sub>: CLASS=['Clinical finding present (situation)'],  
?cluster<sub>23</sub>: OBJECTPROPERTY=[RoleGroup, Subject relationship context (attribute)],  
?expression\_conjunction: CLASS=[((Associated finding (attribute) **some** Coin sign (finding))  
    **and** (Finding context (attribute) **some** Known present (qualifier value))  
    **and** (Temporal context (attribute) **some** Current or specified time (qualifier value)))],  
?cluster<sub>16</sub>: CLASS=['Subject of record (person)']
