# Supplementary material for: Analysing Syntactic Regularities and Irregularities in SNOMED-CT
Source: PubMed Central journal article supplement (PMC3637289; doi:10.1186/2041-1480-3-8), 2012-12-17
Supplement: 2041-1480-3-8-S11.pdf [file 2041-1480-3-8-S11.pdf]

?cluster<sub>19</sub> :

'Foreign body in female genital organs  
and perineum (disorder)'  
'On examination - diabetic maculopathy  
absent both eyes (situation)'  
'Bilateral cataracts (disorder)'  
'Alexia and agraphia present (situation)'  
'Foreign body of body cavity and wall (disorder)'  
'Injury to heart and lung (disorder)'  
'Tumor of lower respiratory tract and  
mediastinum (disorder)'  
'On examination - diabetic maculopathy present  
both eyes (situation)'

Clinical finding absent (situation) *EquivalentTo*  
Situation with explicit context (situation) **and**  
(RoleGroup **some** (Finding context (attribute)  
**some** Known absent (qualifier value)))  
**and** (RoleGroup **some**  
(Temporal context (attribute)  
**some** Current or specified time (qualifier value)))  
**and** (RoleGroup **some**  
(Subject relationship context (attribute)  
**some** Subject of record (person)))

?cluster<sub>20</sub> :

'Musculoskeletal and connective tissue  
disorder (disorder)'  
'Finding with explicit context (situation)'  
'History of clinical finding in subject (situation)'  
'Clinical finding present (situation)'  
'Clinical finding absent (situation)'  
'Disorder of soft tissue of thoracic  
cavity (disorder)'

(b) Example axiom with multiple usage of the RoleGroup  
attribute

?cluster<sub>28</sub> :

'On examination - genitalia (finding)'  
'On examination - skin (finding)'  
'Disorder of soft tissue of body cavity (disorder)'

(a) Outlier clusters with multiple usage of RoleGroup  
attribute in their axioms
