# Supplementary material for: Analysing Syntactic Regularities and Irregularities in SNOMED-CT
Source: PubMed Central journal article supplement (PMC3637289; doi:10.1186/2041-1480-3-8), 2012-12-17
Supplement: 2041-1480-3-8-S12.pdf [file 2041-1480-3-8-S12.pdf]

```
'Chronic urate nephropathy (disorder)' SubClassOf 'Urate nephropathy (disorder)'  
  and (RoleGroup some ('Clinical course (attribute)' some 'Chronic (qualifier value)'))
```
