# Supplementary material for: Analysing Syntactic Regularities and Irregularities in SNOMED-CT
Source: PubMed Central journal article supplement (PMC3637289; doi:10.1186/2041-1480-3-8), 2012-12-17
Supplement: 2041-1480-3-8-S13.pdf [file 2041-1480-3-8-S13.pdf]

**Generalisation:**

?cluster<sub>2</sub> *EquivalentTo* ?cluster<sub>12</sub> **and** (RoleGroup **some** (?cluster<sub>32</sub> **some** ?cluster<sub>20</sub>))

**Example instantiation:**

'Chronic pyonephrosis (disorder)' *EquivalentTo* 'Pyonephrosis (disorder)'  
**and** (RoleGroup **some** ('Clinical course (attribute)' **some** 'Chronic (qualifier value)'))

*where:*

?cluster<sub>2</sub>:CLASS=['Chronic pyonephrosis (disorder)'],

?cluster<sub>12</sub>:CLASS=['Pyonephrosis (disorder)'],

?cluster<sub>32</sub>:OBJECTPROPERTY=[Clinical course (attribute)],

?cluster<sub>40</sub>:CLASS=['Chronic (qualifier value)']
