# Supplementary material for: Analysing Syntactic Regularities and Irregularities in SNOMED-CT
Source: PubMed Central journal article supplement (PMC3637289; doi:10.1186/2041-1480-3-8), 2012-12-17
Supplement: 2041-1480-3-8-S14.pdf [file 2041-1480-3-8-S14.pdf]

'Chronic progressive renal failure (disorder)',  
'Chronic back pain (finding)',  
'Chronic diarrhea of unknown origin (disorder)',  
'Chronic inflammatory demyelinating polyneuritis (disorder)',  
'Chronic cough (finding)', 'Chronic anxiety (finding)',  
'Chronic post-traumatic stress disorder (disorder)',  
'Chronic bullous emphysema (disorder)',  
'Chronic acquired lymphedema (disorder)',  
'Chronic diarrhea (disorder)', 'Chronic constipation (disorder)',  
'Chronic pain syndrome (disorder)'
