# Supplementary material for: Analysing Syntactic Regularities and Irregularities in SNOMED-CT
Source: PubMed Central journal article supplement (PMC3637289; doi:10.1186/2041-1480-3-8), 2012-12-17
Supplement: 2041-1480-3-8-S15.pdf [file 2041-1480-3-8-S15.pdf]

'Acute exacerbation of bronchiectasis (disorder)',  
'Acute cardiac pulmonary edema (disorder)',  
'Acute coronary syndrome (disorder)',  
'Acute and subacute liver necrosis (disorder)',  
'Acute myeloid leukemia with recurrent genetic abnormality (morphologic abnormality)',  
'Gallbladder calculus with acute cholecystitis and no obstruction (disorder)',  
'Acute situational disturbance (disorder), Acute urticaria (disorder)',  
'Acute meniscal tear, medial (disorder)',  
'Acute contagious conjunctivitis (disorder)',  
'Acute schizophrenia-like psychotic disorder (disorder)'
