# Supplementary material for: Analysing Syntactic Regularities and Irregularities in SNOMED-CT
Source: PubMed Central journal article supplement (PMC3637289; doi:10.1186/2041-1480-3-8), 2012-12-17
Supplement: 2041-1480-3-8-S16.pdf [file 2041-1480-3-8-S16.pdf]

```
1.
?c:CLASS, ?x:CONSTANT=MATCH(".Chronic.*")
SELECT ?c.IRI label ?x
WHERE FAIL ?c subClassOf RoleGroup some
  ('Clinical course (attribute)' some 'Chronic (qualifier value)')
BEGIN ADD ?c subClassOf ChronicIncompleteCandidates
END;
```

```
2.
?c:CLASS, ?x:CONSTANT=MATCH(".*chronic.*")
SELECT ?c.IRI label ?x
WHERE FAIL ?c subClassOf RoleGroup some
  ('Clinical course (attribute)' some 'Chronic (qualifier value)')
BEGIN ADD ?c subClassOf ChronicIncompleteCandidates
END;
```
